1 Alireza M. Mohammadi

2 Cleveland Clinic CA-51

3 9500 Euclid Ave.

4 Cleveland, OH 44195

5 Office: (216) 445-4290, fax: (216) 444-0924

6 email: [mohamma3@ccf.org](mailto:mohamma3@ccf.org)

7 **Keywords:** tumor microenvironment; glioblastoma; spatial heterogeneity; tumor-infiltrating

8 immune cells; image-guided biopsy

9 **Trial Registration:** ClinicalTrials.gov identifier NCT04545177

## 1 **Summary**

2 Glioblastoma (GBM) treatment includes maximal safe resection of the core and MRI contrast-  
3 enhancing (CE) tumor. Complete resection of the infiltrative non-contrast-enhancing (NCE)  
4 tumor rim is rarely achieved. We established a safe, semi-automated workflow for spatially-  
5 registered sampling of MRI-defined GBM regions in 19 patients with downstream analysis and  
6 biobanking, enabling studies of NCE, wherefrom recurrence/progression typically occurs.  
7 Immunophenotyping revealed underrepresentation of myeloid cell subsets and CD8+ T cells in  
8 the NCE. While NCE T cells phenotypically and functionally resembled those in matching CE  
9 tumor, subsets of activated (CD69<sup>hi</sup>) effector memory CD8+ T cells were overrepresented.  
10 Contrarily, CD25<sup>hi</sup> Tregs and other subsets were underrepresented. Overall, our study  
11 demonstrated that MRI-guided, spatially-registered, intraoperative immunosampling is feasible  
12 as part of routine GBM surgery. Further elucidation of the shared and spatially distinct  
13 microenvironmental biology of GBM will enable development of therapeutic approaches  
14 targeting the NCE infiltrative tumor to decrease GBM recurrence.

## 1 INTRODUCTION

2 Glioblastoma (GBM) is the most common primary malignant brain tumor in adults<sup>1</sup>, with a near  
3 100% recurrence rate after standard care with surgery, radiation, and chemotherapy<sup>2</sup>. While  
4 immune checkpoint inhibitors (e.g. anti-PD-1, -PD-L1, -CTLA-4) have improved outcomes in  
5 numerous other cancer types, they have shown limited efficacy in GBM<sup>3</sup>. Implementing  
6 checkpoint inhibition and other forms of immunotherapy in GBM has been challenging due to  
7 the presence of a highly immunosuppressive tumor microenvironment, driven by tumor cells and  
8 numerous immunosuppressive mechanisms in the brain<sup>3,4</sup>. An additional layer of complexity  
9 arises from spatial heterogeneity of the immune microenvironment, resulting from physical  
10 microenvironmental factors (such as hypoxia, the blood brain barrier, etc.), tumor cell  
11 heterogeneity, and varying interactions with brain-resident cells<sup>4</sup>. Further complicating the  
12 rational design of GBM immunotherapy are technical factors associated with tissue collection  
13 and handling that can harm cells in the tissue sample (including immune cells) leading to  
14 analytical bias with commonly utilized techniques of flow cytometry and single cell sequencing<sup>5</sup>.  
15 Accurately elucidating immune microenvironment spatial heterogeneity in clinically meaningful  
16 contexts has the potential to inform future GBM trials, especially those utilizing immunotherapy.

17 In the context of surgical resection—the first step in standard GBM management—tumors are  
18 segmented based on contrast-enhanced MRI, with the tumor core and contrast-enhancing (CE)  
19 regions being targeted for complete resection<sup>2</sup>. However, previous studies have shown that  
20 maximal safe resection of adjacent T2/FLAIR hyperintense, non-contrast-enhancing (NCE)  
21 tumor regions further improves patient outcomes by targeting the leading edge of the infiltrative  
22 tumor, where the majority of recurrences occur<sup>6,7</sup>. In many cases though, the extent of resection  
23 is limited by eloquent regions of brain and the need to preserve neurological function, resulting  
24 in earlier progression which is only partially mitigated by adjuvant chemoradiotherapy<sup>6,7</sup>. While

1 previous studies have described spatial heterogeneity by various segmentation strategies, how  
2 this relates to the clinically relevant MRI-defined regions remain poorly understood.

3 In this prospective study, we developed a streamlined workflow for MRI-guided, spatially-  
4 registered intraoperative sampling of the core, CE, and NCE regions for downstream immune  
5 profiling and biobanking. Given the established link between CE and inflammation in MRI<sup>8</sup>, we  
6 hypothesized that the NCE would be characterized by a pauci-immune microenvironment, with  
7 T lymphocytes lacking activation/exhaustion markers that are hallmarks of tumor-infiltrating  
8 lymphocytes. While we did observe a lower abundance of leukocytes in the NCE, they  
9 phenotypically and functionally resembled immune cell populations found in the core and CE  
10 regions. On the other hand, specific T cell subsets displayed differential abundance in the NCE,  
11 including activated effector memory CD8<sup>+</sup> cells. These data suggest that designing adjuvant  
12 immunotherapeutic strategies that enable this region's immune cells to target residual GBM in  
13 the NCE could be a potentially promising approach to limit recurrence of this deadly disease.

## 14 **RESULTS**

### 15 **Optimized workflow facilitates high-viability, spatially-registered GBM sampling**

16 19 patients were included in this study (**Table S1**), and one patient was excluded from analysis  
17 due to postoperative diagnosis of IDH-mutant tumor. Tissue acquisition was surgically feasible  
18 at all annotated regions using the NICO Myriad device (**Figure 1A-B**) and on average, sampling  
19 added 10 minutes to surgical time. No adverse events attributable to the device or acquisition  
20 protocol were observed. The workflow we developed obtained sufficient cells for immediate flow  
21 cytometry in 96.5% (55/57) samples. 86% (49/57) of samples were sufficient to additionally  
22 biobank viably frozen single-cell suspensions, while 98.2% of samples were sufficient to  
23 generate flash frozen tumor specimens. We next assessed the viability of fresh single-cell  
24 suspensions by flow cytometry using a viability dye as a quality metric of the GBM sampling

1 workflow we developed. Median viability was >80% in all sampled regions, with the NCE  
2 displaying the highest viability (median 98%, 95% confidence interval [CI] 91-99%; **Figure 1C**).  
3 Most of the very low viability samples (<50%) were found in the core (4 of 6), possibly reflecting  
4 sampling in or around necrotic regions characteristic of GBM rather than a result of sample  
5 processing.

### 6 **NCE tumor has lower frequency of infiltrating immune cells**

7 Immediate immunophenotyping of single-cell suspensions allowed us to assess the immune  
8 microenvironment of the three designated tumor regions (see **Supplementary Figure S1** for  
9 gating strategy), including cells prone to loss during freeze/thaw of banked samples. The  
10 proportion of live cells that were leukocytes varied greatly, from 0.68 – 76.5% (**Figure 1D**). In  
11 line with our originating hypothesis, the overall abundance of tumor-infiltrating immune cells was  
12 found to be decreased in the NCE region (median 3.6%) compared to the CE region (median  
13 17.3%) and core (median 13%) (**Figure 1D-E**). Neutrophils, macrophages/microglia,  
14 granulocytic and monocytic myeloid-derived suppressor cells (g [or PMN] and mMDSC), and T  
15 cells were all underrepresented in the NCE (**Figure 1F**).

### 16 **T cells in NCE tumor retain characteristics of CE regions**

17 Given the observed decrease in the abundance of multiple immune cell subset in the NCE, we  
18 hypothesized that this region would be immunologically “cold” and characterized by T cells with  
19 lower levels of activation and exhaustion as compared to the main tumor mass (CE and core).  
20 To test this hypothesis, we performed in-depth T cell immunophenotyping. In the initial analysis  
21 of freshly isolated cells, we observed a decrease in the CD8<sup>+</sup>:CD4<sup>+</sup> T cell ratio in the NCE  
22 region (**Figure 2A**). In CD4<sup>+</sup> T cells, an increased relative frequency of effector memory  
23 (CD45RA<sup>lo/-</sup>CCR7<sup>lo/-</sup>) cells was observed at the expense of central memory (CD45RA<sup>lo/-</sup>CCR7<sup>+</sup>)  
24 cells in the NCE (**Figure 2B**). While the same pattern was observed among CD8<sup>+</sup> T cells, this

1 did not reach statistical significance (**Figure 2C**). In a subset of patients, we further assessed a  
2 more expanded panel of activation and exhaustion markers in T cells from biobanked (viably  
3 frozen) samples (see gating strategy in **Supplementary Figure S2**) and found that an  
4 increased relative frequency of PD-1<sup>+</sup>TOX<sup>+</sup> cells of CD4<sup>+</sup> and CD8<sup>+</sup> T cells in the CE compared  
5 to the core (**Figure 3A-B**). Furthermore, we observed increase in relative frequency of PD-  
6 1<sup>+</sup>CD38<sup>+</sup> cells in CD8<sup>+</sup> T cells in the CE and NCE compared to the core (**Figure 3B**). However,  
7 we found that T cells in the NCE phenotypically overall resembled those found in the CE and  
8 core when analyzed by manual gating (**Figure 3**). Next, we analyzed the abundance of immune  
9 cell subsets in the core, CE and NCE by unsupervised analysis to uncover differences that were  
10 not detected by manual gating (**Figure 4** and **Supplementary Figure S3**). From 20 computed  
11 clusters by FlowSOM algorithm (**Supplementary Figure S3**), T cells from NCE showed some  
12 distinct features, including increased abundance of CD69<sup>hi</sup>PD-1<sup>hi</sup> or CD69<sup>hi</sup>2B4<sup>hi</sup> CD8  
13 “Activated” effector memory (CCR7<sup>-</sup>CD45RA<sup>-</sup>) T cells, and TCF1<sup>hi</sup> CD8 “Naïve-like” central  
14 memory (CCR7<sup>+</sup>CD45RA<sup>-</sup>) T cells (**Figure 4A-B**). Contrarily, Ki67<sup>hi</sup> CD4 “Proliferating”  
15 regulatory T cells (CD25<sup>+</sup>Foxp3<sup>+</sup>) showed decreased abundance in NCE compared to the core  
16 and CE. (**Figure 4B**). Furthermore, T cells from CE showed increased abundance of Ki67<sup>hi</sup>PD-  
17 1<sup>hi</sup> CD4 “Proliferating” central memory (CCR7<sup>+</sup>CD45RA<sup>-</sup>) and CD69<sup>hi</sup>PD-1<sup>hi</sup> “Activated” CD4  
18 central memory (CCR7<sup>+</sup>CD45RA<sup>-</sup>) T cells (**Figure 4B**), but TCF1<sup>hi</sup> “Naïve-like” CD4 central  
19 memory (CCR7<sup>+</sup>CD45RA<sup>-</sup>) T cells showed decreased abundance in CE compared to the core  
20 and NCE (**Figure 4B**).

21 Given that overall T cells found in the NCE regions resembled those found in the CE, we went  
22 on to assess their functional capacity in response to *in vitro* nonspecific stimulation with  
23 PMA/ionomycin in a subset of patient samples. We found that upon stimulation, both CD8<sup>+</sup> and  
24 non-Treg CD4<sup>+</sup> (i.e. FoxP3<sup>-</sup>) T cells retained the capacity to produce Granzyme B, TNF $\alpha$ , and  
25 IFN $\gamma$  (**Supplementary Figure S4**).

## 1 DISCUSSION

2 Findings from this study demonstrate that navigation-assisted sampling and semi-automated  
3 tissue collection, stabilization, and preservation using the proposed workflow system is a safe  
4 and feasible technique to obtain viable cells for evaluation of immune spatial heterogeneity of  
5 GBM. By having a high viability of cells in each specimen, it can increase the volume of usable  
6 target tissue collected. Additionally, given the filter design of the tissue acquisition system,  
7 minimal specimen (both tumor and immune components) gets discarded through the suction, as  
8 can be standard in normal neurosurgical practice. This workflow can be easily standardized  
9 across centers and enable safe transport of usable tissue for appropriate analysis regardless of  
10 the hospital laboratory capabilities and location, especially for smaller centers.

11 Our phenotypic and functional analysis of T cells in the NCE suggest that the tumor-associated  
12 immune response extends beyond the tumor core and CE, which together comprise the regions  
13 of standard-of-care GBM resection. Thus, as an interface of brain and infiltrative tumor, the  
14 NCE shows signs of tumor-associated immune alterations, with T cells expressing high levels of  
15 activation and exhaustion markers seen in the CE and core regions, despite being fewer in  
16 number. There are limited studies published on these findings. It was recently observed using  
17 MRI characteristics that the ratio of recruited vs. resident macrophages differed in terms of  
18 immunomodulatory activities<sup>9</sup>. This study also found that bone marrow-derived macrophages  
19 decrease from the central to the marginal area of the tumors, and microglia cells increase from  
20 the necrosis and core to the margin, the former of which is similar to our results. However, this  
21 study did not assess lymphocytes in their published results, nor did they assess the functional  
22 characteristics of these myeloid cells. Nevertheless, their results suggest that spatial differences  
23 in immune infiltrates exist in GBM, and that radiomic profiling using MRI has the potential to  
24 non-invasively characterize the heterogeneity of the immunosuppressive microenvironment.



1 Spatially registered sampling brings about several exciting possibilities with the advent of  
2 advanced molecular profiling of GBM tumors and the immune microenvironment, all of which  
3 are dependent on accurate analysis of viable cells. GBM tumors have been found to be spatially  
4 and temporally heterogenous, creating specific niches with transcriptional adaptations  
5 influenced by the tumor microenvironment<sup>10</sup>. As GBM progression typically occurs in a region  
6 continuous with the resection cavity, prediction of recurrence-associated genetic and  
7 microenvironmental changes and treatments targeted to that specific tumor cell niche may be  
8 possible with analysis of spatially-acquired samples. This can be invaluable as individualized  
9 immunotherapeutic approaches can be made for each patient, especially with the increasing  
10 number of clinical trials utilizing targeted therapies. Additionally, this type of immunosampling  
11 may identify potential targetable immune deficits that could be overcome with a specific  
12 therapeutic approach (e.g. recurrence region was identified to have exhausted T cells through a  
13 specific immune checkpoint receptor). While there is literature supporting supra-total resection  
14 (beyond the CE boundary on MRI) to improve outcomes in GBM, boundaries can be limited by  
15 critical brain regions that are unable to be removed due to likelihood of permanent post-  
16 operative deficit (i.e. eloquent regions), resulting in subtotal resection or only being able to  
17 biopsy<sup>7</sup>. Therefore, these results may help inform immunomodulatory strategies needed to  
18 target any residual, infiltrating non-enhancing tumor.

## 19 **Limitations of the Study**

20 While our study was prospective in nature, limitations of our study include a small number of  
21 patients, lack of a normal brain control region, and lack of correlation to outcomes data to  
22 identify prognostic factors. A true control region of the brain would ideally require distant or  
23 contralateral sampling, which is not feasible due to risk-related ethical reasons. Creation and  
24 validation of preclinical animal models could help to inform this point, and design future human

1 studies based off of this work. Further long term follow up and detailed molecular profiling of the  
2 tumor specimens will allow us to correlate these findings with patient outcomes.

### 3 **Acknowledgements**

4 We would like to thank Mary McGraw and Sadie Johnson (Cleveland Clinic) for coordination of  
5 tissue procurement. We also thank NICO Corporation for kindly providing the NICO Myriad and  
6 Tissue Preservation System, funding for the conduct of the study and for discussions throughout  
7 the study.

### 8 **Authors' Contributions**

9 Conceptualization, MMG, DCW, MSA, JDL, AMM; Methodology, MMG, DCW, MSA, JDL, AM,  
10 KC; Investigation, MMG, DCW, JL, DB, AM, TA, AMM, KC; Writing – Original Draft, MMG and  
11 DCW; Writing – Review & Editing, JL, DB, AL, TA, JM, TC, MSA, JDL, AMM, KC; Funding  
12 Acquisition, JDL, MSA, AMM; Resources, JM, JDL, AMM; Supervision, JM, TC, MSA, JDL,  
13 AMM

### 14 **Competing Interests**

15 NICO Corporation provided the NICO Myriad and Tissue Preservation System devices at no  
16 cost. MSA declares the following: Research funding from Seagen; Consultation for Bayer,  
17 Novocure, Kiyatec, Insightec, GSK, Xoft, Nuvation, Cellularity, SDP Oncology, Apollomics,  
18 Prelude, Janssen, Tocagen, Voyager Therapeutics, Viewray, Caris Lifesciences, Pyramid  
19 Biosciences, Anheart Therapeutics, Varian Medical Systems, Theraguix; Scientific Advisory  
20 Board for Cairn Therapeutics, Pyramid Biosciences, Modifi Biosciences; Stock shareholder of  
21 Mimivax, Cytodyn, MedInnovate Advisors LLC.

22 The authors have declared that no other potential conflict of interest exists.

1 **Funding**

- 2 Case Comprehensive Cancer Center (JDL), Cleveland Clinic Lerner Research Institute (JDL),  
3 5T32AI007024-40 (DCW), R35 NS127083 (JDL), K99 CA248611 (DB), Reza Khatib, MD  
4 Endowed Chair in Neurosurgery (AMM), F30 CA250254 (AL), Fernandez Family Foundation  
5 Endowed Chair in Cancer Research (MSA).

6 **Inclusion and Diversity Statement**

- 7 We support inclusive, diverse, and equitable conduct of research.

## 1 **FIGURE LEGENDS**

2 **Figure 1: Spatially-registered GBM sampling workflow enables studies of regional GBM**  
3 **heterogeneity. (A)** Schematic overview of workflow. **(B)** Sagittal MRI plane depicting 3 NICO  
4 Myriad trajectories (yellow dotted lines) to obtain spatially-registered samples from human GBM  
5 (red outline). 1=core, 2=CE, 3=NCE. **(C)** Viability of fresh single-cell suspensions analyzed by  
6 flow cytometry, as a percent of total singlet cell events. **(D)** Abundance of total CD45-expressing  
7 leukocytes in each tumor region, as a percent of live cells. **(E)** Overview of spatial heterogeneity  
8 in leukocyte abundance (as percent of total live cells), normalized to median of each cell type.  
9 **(F)** Abundance of individual immune cell subsets across tumor regions, as a percent of live  
10 cells. \*p <0.05, \*\*p<0.01, \*\*\*p<0.001; Freidman test.

11 **Figure 2: NCE has lower CD8:CD4 T cell ratio, with more abundant CD4+ T effector**  
12 **memory cells. (A)** CD8:CD4 T cell ratio by flow cytometry. Mixed-effects model ANOVA. **(B)**  
13 CD4+ and **(C)** CD8+ T cell memory cell subsets. 2-way ANOVA. \*p<0.05; ns – not significant.

14 **Figure 3: Increased PD-1+TOX+ T cells in CE tumor. (A)** Abundance of CD38<sup>+</sup>PD-1<sup>+</sup>,  
15 CD39<sup>+</sup>PD-1<sup>+</sup>, TOX<sup>+</sup>PD-1<sup>+</sup> in CD4<sup>+</sup> T cells in each tumor region, as a percent of total cells. Each  
16 line indicates individual patients. Paired t-test. **(B)** Abundance of CD38<sup>+</sup>PD-1<sup>+</sup>, CD39<sup>+</sup>PD-1<sup>+</sup>,  
17 TOX<sup>+</sup>PD-1<sup>+</sup> in CD8<sup>+</sup> T cells in each tumor region, as a percent of total cells. Each line indicates  
18 individual patients. Paired t-test.

19 **Figure 4: Differential abundance of T cell subsets in NCE revealed by unsupervised clustering**  
20 **analysis. (A)** Cluster frequency within each region. **(B)** Differentially abundant CD8+ T cell clusters. **(C)**  
21 Differentially abundant CD4+ T cell clusters. Paired t-test.

## 1 **MATERIALS AND METHODS**

### 2 **Clinical study design and objectives**

3 This is a single site, interventional cohort study to assess a standardized method for spatially-  
4 registered intraoperative sampling of viable tumor tissue using the NICO Myriad and Tissue  
5 Preservation System (TPS) with MRI guidance in 20 prospectively-enrolled GBM patients  
6 undergoing surgical resection (NCT04545177). The primary objective of the study was to  
7 assess feasibility of the sampling process and viability of each sample's immune cell population  
8 as measured by flow cytometry. The exploratory objectives of the study were to assess the  
9 spatial immune heterogeneity of GBM tumor specimens obtained during surgery by flow  
10 cytometry in the NCE, CE, and tumor core regions.

### 11 **Patient selection**

12 Patients were enrolled if they had a newly-diagnosed or recurrent WHO grade IV, IDH-wildtype  
13 glioblastoma (histologically-confirmed via frozen or previous pathology) and were clinically  
14 indicated to undergoing resection. All subjects were at least 18 years of age, had a CE tumor  
15 volume of at least 15 cc on the preoperative MRI, and a Karnofsky Performance status  $\geq 70$ .  
16 One patient was excluded from analysis after enrollment, due to post-operative diagnosis of  
17 IDH-mutant tumor.

### 18 **MRI-guided tumor segmentation and spatial mapping**

19 Utilizing preoperative stereotactic MRI, the tumor was divided into sectors based on  
20 radiographic and/or geographic regions which were accessible/resectable using  
21 neuronavigation during surgery. Tumor regions selected for sampling were from 3 separate  
22 regions: the necrotic core of tumor, the solid CE rim, and the adjacent NCE, T2/FLAIR abnormal  
23 region outside of the enhancing rim (**Figure 1B**). Priority was given to selecting maximally  
24 distinct tissue regions based on geographic location and radiographic findings. Regions were

1 annotated before surgery on the Brainlab Cranial Elements software (Brainlab AG, Munich,  
2 Germany).

### 3 **Surgical methods**

4 Surgery was performed in the standard fashion with neuronavigation using the Brainlab Cranial  
5 software. Annotated regions were localized and the tissue surgically harvested by the  
6 neurosurgeon using the navigable NICO Myriad™, an FDA cleared suction/microscissor device  
7 that transects tissues and suctions the bio-specimen into a sterile collection chamber, the  
8 automated Tissue Preservation System (TPS, NICO Inc., Indianapolis, IN). The closed, sterile,  
9 specimen collection chamber is affixed with a 263um filter and housed within a styrofoam chiller.  
10 Harvested tissue was held within the collection chamber and perfused with preservation solution  
11 (lactated ringers). The chilling apparatus kept bio-specimens at 4-8 °C. Bio-specimen collection  
12 chambers were labeled with study-specific identifiers (protocol number, patient ID, date of  
13 collection) and unique sector of the tumor, as each sector had its own collection chamber.  
14 Labeled samples were then transported in a closed, controlled temperature environment from  
15 the operating room to the pathology laboratory for analysis when appropriate.

### 16 **Tissue processing**

17 Tumor specimens were kept in the TPS enclosure on ice and transported to the research  
18 laboratory within 45 min of acquisition. All subsequent tissue manipulation was carried out in a  
19 biosafety cabinet. The enclosures were sequentially opened, and tissue manually collected into  
20 a 10cm Petri dish by scraping the collection mesh using flat-end forceps. Half of the tissue was  
21 divided into 3-5 mm pieces, flash frozen in liquid nitrogen, and stored at -80°C. The remaining  
22 tissue was used to generate single cell suspension. Specifically, tissue was moved Miltenyi  
23 gentleMACS C-tubes (up to 1 g per tube) containing 5 mL of digestion solution (Miltenyi human  
24 Tumor Dissociation Kit), using the kit components suggested by the manufacturer for  
25 downstream flow cytometry. The C-tubes were then connected to the gentleMACS Octo-

1 dissociator with heaters (Miltenyi) and dissociated using the 37\_h\_TDK\_1 device program.  
2 Digested material was strained through a 70 um SmartStrainer (Miltenyi) into a 50 mL conical  
3 tube. Any residual tissue clumps on the strainer mesh were manually smashed onto the mesh  
4 using the back of a 1 mL syringe plunger, and strainer mesh was finally washed with 10-20 mL  
5 of RPMI medium. Cell suspension was pelleted by centrifugation at 300 x g for 5 min. Cell  
6 pellets were resuspended in ~5 mL of 1X RBC lysis buffer (Biolegend) per 1 g of tissue input,  
7 and incubated at room temperature for 5 min, manually gently agitating the cell suspension  
8 every 1-2 minutes. The lysis reaction was stopped by addition of 25 mL of PBS, and cells were  
9 again pelleted by centrifugation. Cell pellet was resuspended in RPMI and counted with Trypan  
10 blue exclusion. Depending on cell yield, 2 to 20 million cells were withdrawn and moved to  
11 microtubes for immediate immunophenotyping (*below*). The rest were pelleted by centrifugation  
12 and resuspended in serum-free freezing medium (ATCC) for freezing using a rate freezer, and  
13 subsequent storage of the frozen single-cell suspensions in liquid nitrogen freezer.

#### 14 **Flow cytometric analysis**

15 Aliquots of freshly digested single-cell suspensions in microtubes (*see above*) were pelleted by  
16 centrifugation at 300 x g for 5 min, resuspended in 1 mL of PBS, and pelleted again. Cell pellets  
17 were resuspended in 200 µL of Live/Dead Blue solution (1:1,000 in PBS, Invitrogen), and  
18 incubated on ice for 10 min, protected from light. 750 µL of FACS buffer (2% bovine serum  
19 albumin [BSA, Sigma] in PBS) was added to quench the reaction, and cells were pelleted by  
20 centrifugation. Cells were resuspended in 150 µL of human Fc receptor blocking reagent (1:50  
21 in FACS buffer, Miltenyi), and incubated for 15 min on ice, protected from light. Sample divided  
22 to 2 (for staining with different antibody cocktails, below), and pelleted by centrifugation. Each  
23 cell pellet was then resuspended 100 µL of antibody cocktail prepared in Brilliant Stain Buffer  
24 (BD Biosciences) (**Supplementary Table S1**), and incubated for 20 min on ice, protected from  
25 light. 500 µL of FACS buffer was added, and cells were pelleted. Cell pellet was resuspended in

1 fixation/permeabilization buffer (FoxP3 Fix/Perm set, Ebioscience), and incubated at 4°C for 30  
2 min or overnight. 1 mL of permeabilization buffer from the same kit, and cells were pelleted by  
3 centrifugation at 400 x g for 5 min. Cell pellets were resuspended in 100 µL of intracellular  
4 antibody cocktails in permeabilization buffer (**Supplementary Table S1**), and incubated for 20  
5 min at room temperature. 1 mL of permeabilization buffer was added, and cells were pelleted by  
6 centrifugation at 400 x g for 5 min. Cell pellet was resuspended in FACS buffer and stored at  
7 4°C until flow cytometric analysis on Fortessa LSR II (BD Biosciences) or Cytex Aurora (Cytex  
8 Biosciences). Data was analyzed using FlowJo X (BD Biosciences) using gating strategies and  
9 unsupervised computational high dimensional analysis outlined in **Supplementary Figures S1-**  
10 **S3**. Biobanked samples were similarly stained upon thawing with T cell focused panels,  
11 described in **Tables S2-S3**.

## 12 **In vitro T cell functional assay**

13 In vitro T cell functional assay was performed on cryopreserved single-cell suspension. Thawed  
14 cell were washed and resuspended in pre-warmed RPMI media supplemented with 10% FBS,  
15 1% penicillin/streptomycin and GlutaMax (Gibco). Cells were stimulated in the presence of  
16 stimulation cocktail (PMA/ionomycin, brefeldin A, monensin) (eBioscience) for 5 hours. Then  
17 cells were harvested and subjected for flow cytometry analysis as described above.

## 18 **Statistics**

19 Statistical analysis was performed on GraphPad Prism 8.4. Comparison of viability and  
20 individual cell populations was by paired non-parametric analysis (Friedman Test), with post-hoc  
21 Dunn's multiple comparison test. Comparison of T cell memory phenotypes was by 2-way  
22 ANOVA with post-hoc Holm-Sidak test for multiple comparisons. Comparison of clusters from  
23 unsupervised analysis was by paired parametric analysis (paired T test).

## 24 **Study approval**



1 All patients provided informed consent for study participation prior to enrollment. The clinical trial  
2 protocol was reviewed and approved by the Case Comprehensive Cancer Center's Protocol  
3 Review and Monitoring Committee (CASE8319), the Cleveland Clinic Institutional Review Board  
4 (#20-499), and is registered on ClinicalTrials.gov (NCT04545177).

## 5 REFERENCES

- 6 1. Ostrom, Q.T., Cioffi, G., Waite, K., Kruchko, C., and Barnholtz-Sloan, J.S. (2021).  
7 CBTRUS Statistical Report: Primary Brain and Other Central Nervous System Tumors  
8 Diagnosed in the United States in 2014-2018. *Neuro. Oncol.* 23, III1–III105.  
9 10.1093/NEUONC/NOAB200.
- 10 2. Alexander, B.M., and Cloughesy, T.F. (2017). Adult glioblastoma. *J. Clin. Oncol.* 35,  
11 2402–2409. 10.1200/JCO.2017.73.0119.
- 12 3. Yang, K., Wu, Z., Zhang, H., Zhang, N., Wu, W., Wang, Z., Dai, Z., Zhang, X., Zhang, L.,  
13 Peng, Y., et al. (2022). Glioma targeted therapy: insight into future of molecular  
14 approaches. *Mol. Cancer* 21. 10.1186/S12943-022-01513-Z.
- 15 4. Grabowski, M.M., Sankey, E.W., Ryan, K.J., Chongsathidkiet, P., Lorrey, S.J., Wilkinson,  
16 D.S., and Fecci, P.E. (2021). Immune suppression in gliomas. *J. Neurooncol.* 151, 3.  
17 10.1007/S11060-020-03483-Y.
- 18 5. Gastman, B., Agarwal, P.K., Berger, A., Boland, G., Broderick, S., Butterfield, L.H., Byrd,  
19 D., Fecci, P.E., Ferris, R.L., Fong, Y., et al. (2020). Defining best practices for tissue  
20 procurement in immuno-oncology clinical trials: consensus statement from the Society for  
21 Immunotherapy of Cancer Surgery Committee. *J. Immunother. cancer* 8. 10.1136/JITC-  
22 2020-001583.

- 1 6. Campos, B., Olsen, L.R., Urup, T., and Poulsen, H.S. (2016). A comprehensive profile of  
2 recurrent glioblastoma. *Oncogene* 35, 5819–5825. 10.1038/ONC.2016.85.
- 3 7. Hirono, S., Ozaki, K., Kobayashi, M., Hara, A., Yamaki, T., Matsutani, T., and Iwadate, Y.  
4 (2021). Oncological and functional outcomes of supratotal resection of IDH1 wild-type  
5 glioblastoma based on 11C-methionine PET: a retrospective, single-center study. *Sci.*  
6 *Reports* 2021 111 11, 1–12. 10.1038/s41598-021-93986-z.
- 7 8. Kersch, C.N., Ambady, P., Hamilton, B.E., and Barajas, R.F. (2022). MRI and PET of  
8 Brain Tumor Neuroinflammation in the Era of Immunotherapy, From the AJR Special  
9 Series on Inflammation. *AJR. Am. J. Roentgenol.* 218, 582. 10.2214/AJR.21.26159.
- 10 9. Salvalaggio, A., Silvestri, E., Sansone, G., Pinton, L., Magri, S., Briani, C., Anglani, M.,  
11 Lombardi, G., Zagonel, V., Della Puppa, A., et al. (2022). Magnetic Resonance Imaging  
12 Correlates of Immune Microenvironment in Glioblastoma. *Front. Oncol.* 12.  
13 10.3389/FONC.2022.823812/FULL.
- 14 10. Ravi, V.M., Will, P., Kueckelhaus, J., Sun, N., Joseph, K., Salié, H., Vollmer, L.,  
15 Kuliesiute, U., von Ehr, J., Benotmane, J.K., et al. (2022). Spatially resolved multi-omics  
16 deciphers bidirectional tumor-host interdependence in glioblastoma. *Cancer Cell* 40, 639-  
17 655.e13. 10.1016/J.CCELL.2022.05.009.

18

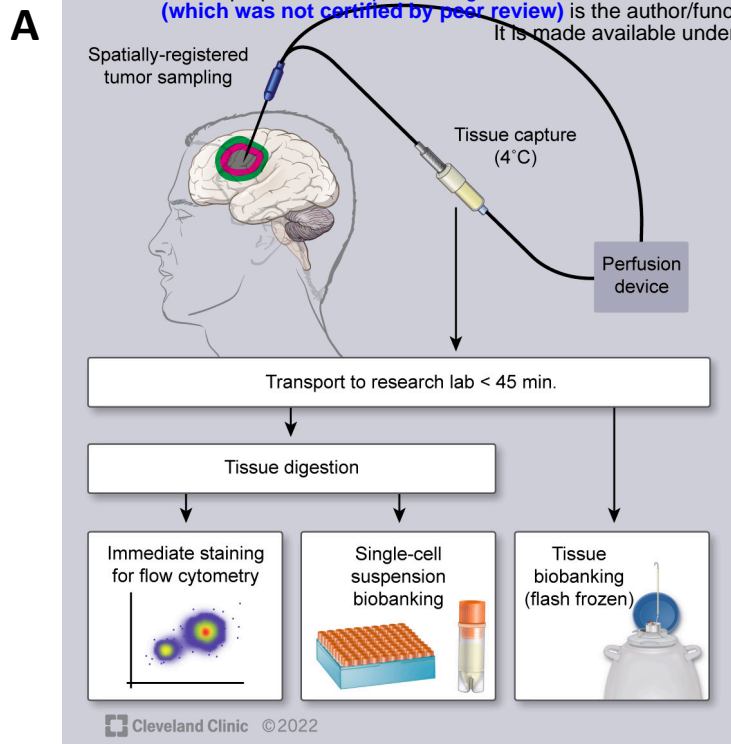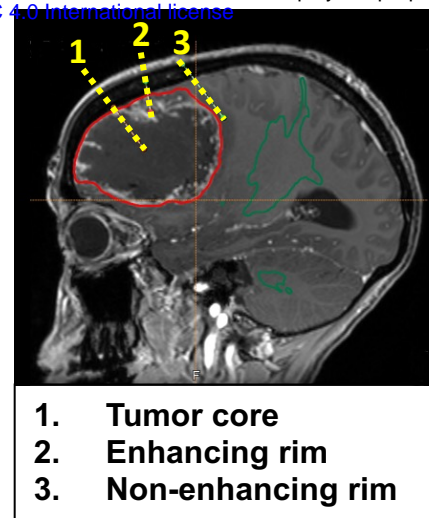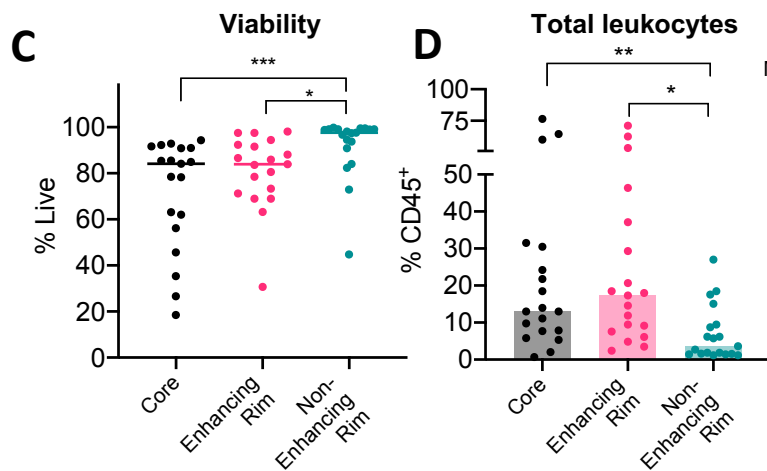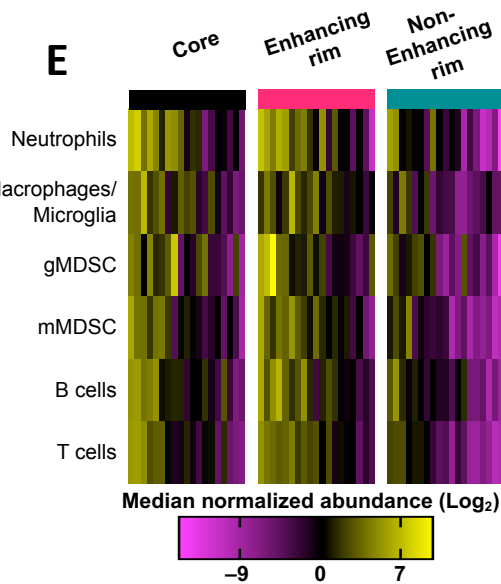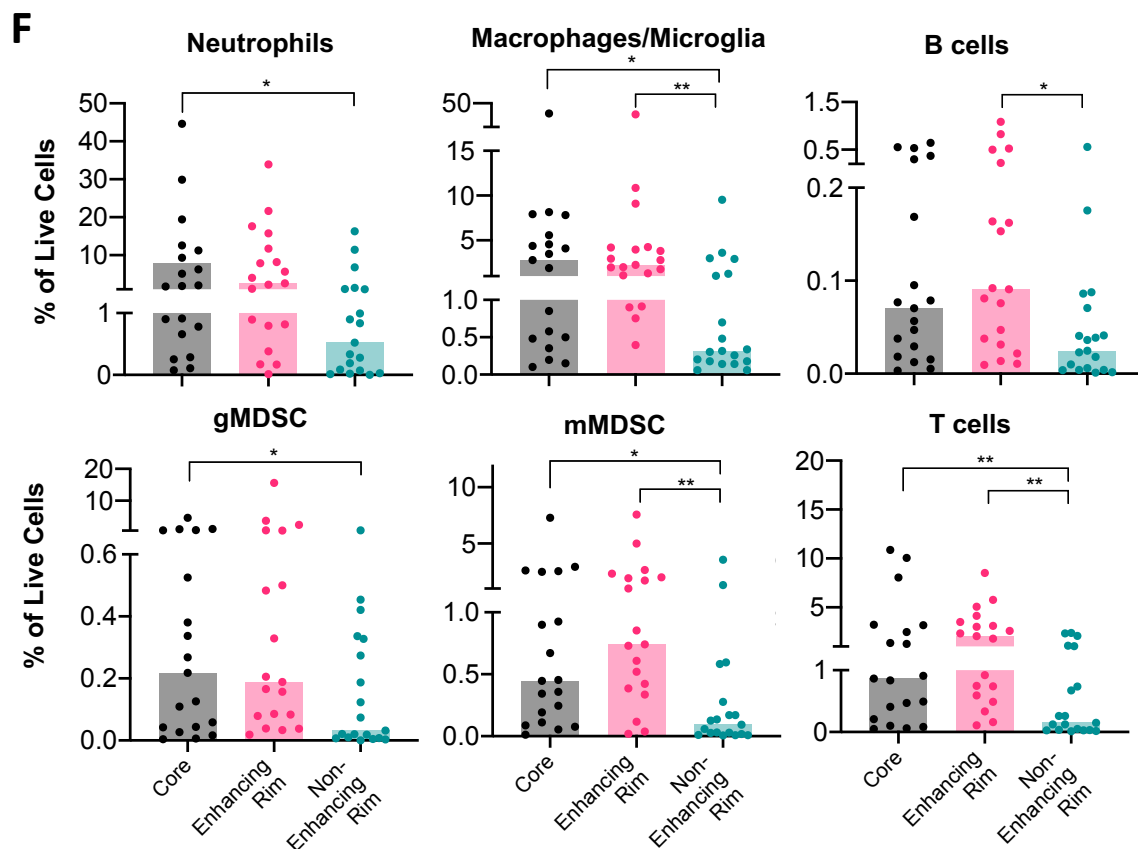

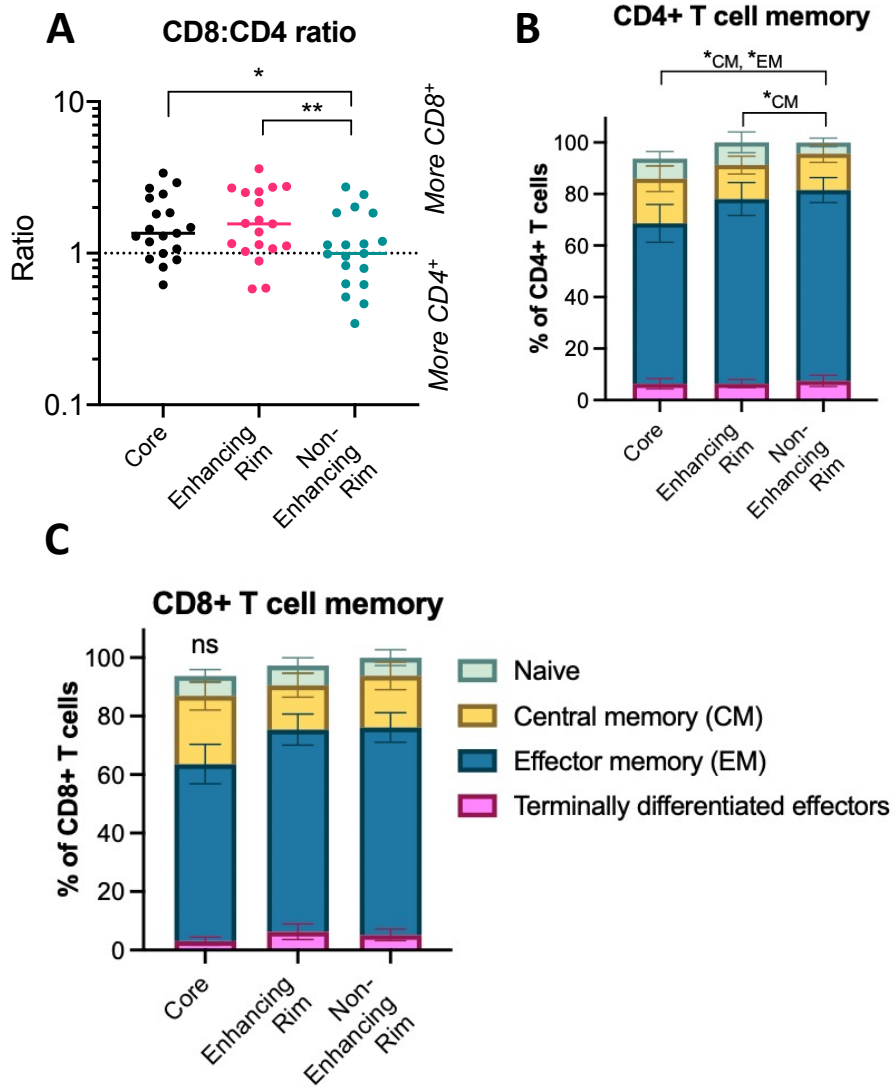

**A**

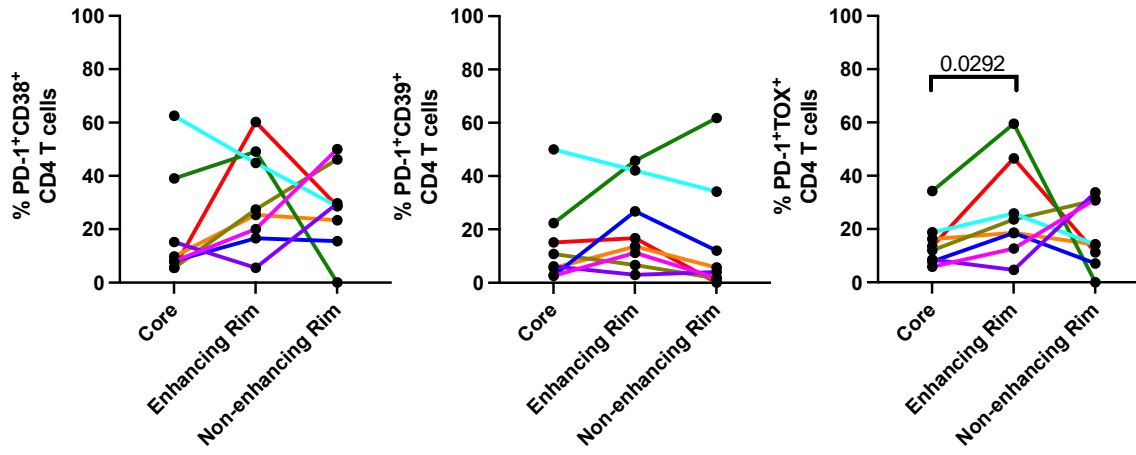

**B**

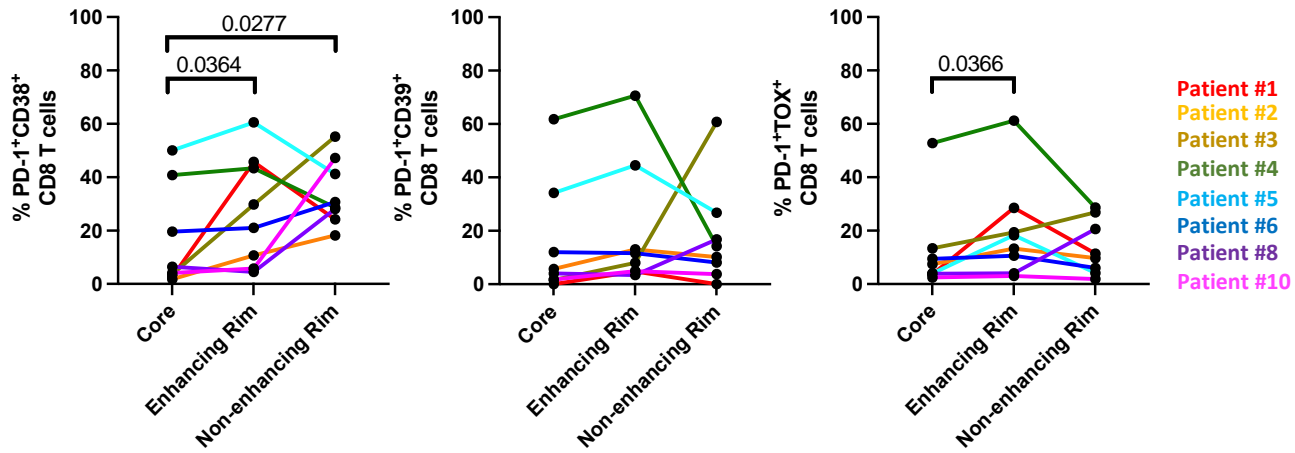

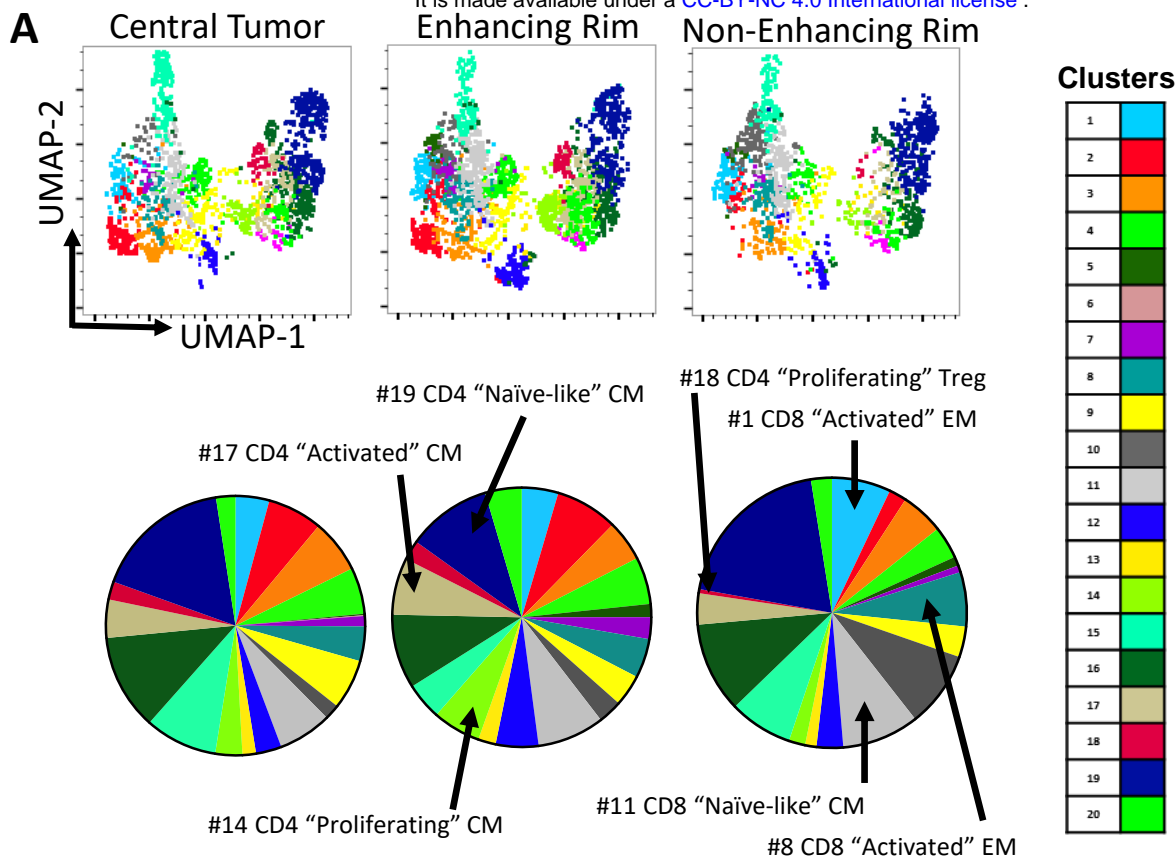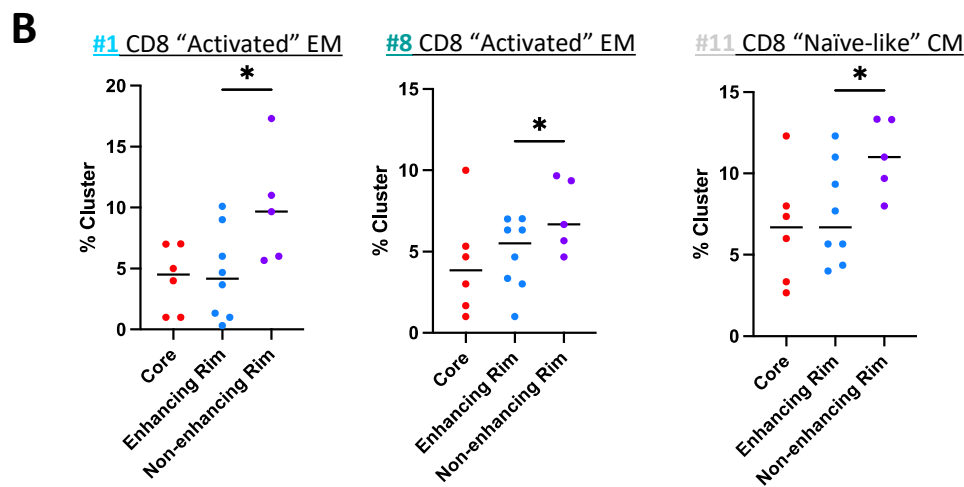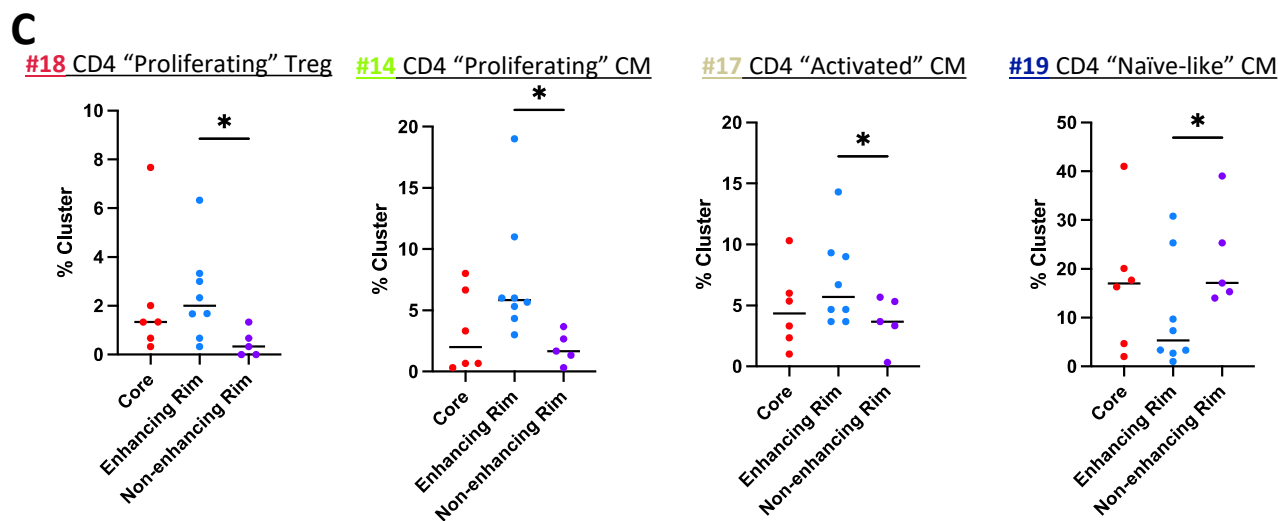

Source: https://medrxiv.org/content/10.1101/2023.03.09.23285970v1.full.pdf
